# Supplementary material for: Anodically fabricated TiO2–SnO2nanotubes and their application in lithium ion batteries
Source: Royal Society of Chemistry journal article supplement (doi:10.1039/c6ta00182c), 2016-01-01
Supplement: c6ta00182c1.pdf [file c6ta00182c1.pdf]

## Supplementary Information

### **Anodically fabricated TiO<sub>2</sub>-SnO<sub>2</sub> nanotubes and their application in lithium ion batteries**

M. Madian,<sup>\*a,b,c</sup> M. Klose,<sup>a,d</sup> T. Jaumann,<sup>a</sup> A. Gebert,<sup>a</sup> S. Oswald,<sup>a</sup> N. Ismail,<sup>c</sup> A. Eychmüller,<sup>b</sup> J. Eckert<sup>a,d,§</sup> and L. Giebeler<sup>a,d</sup>

- a. Leibniz Institute for Solid State and Materials Research (IFW) Dresden e.V., Institute for Complex Materials, Helmholtzstr. 20, D-01069 Dresden, Germany.
- b. Technische Universität Dresden, Physical Chemistry, Bergstr. 66b, D-01069 Dresden, Germany.
- c. National Research Centre, Physical Chemistry Department, 33 El-Buhouth St., 12311 Dokki, Giza, Egypt.
- d. Technische Universität Dresden, Institut für Werkstoffwissenschaft, Helmholtzstr. 7, D-01069 Dresden, Germany.

§ present address: Erich Schmid Institute of Materials Science, Austrian Academy of Sciences and Department Materials Physics, Montanuniversität Leoben, Jahnstr. 12, A-8700 Leoben, Austria.

Tab. S1. ICP-OES analysis of the as-cast Ti–Sn alloys.

| Alloy   | Sn concentration (at.%) | Ti concentration (at.%) |
|---------|-------------------------|-------------------------|
| Ti-1Sn  | $1.003 \pm 0.001$       | $98.997 \pm 0.001$      |
| Ti-5Sn  | $5.003 \pm 0.001$       | $94.997 \pm 0.001$      |
| Ti-10Sn | $10.014 \pm 0.001$      | $89.986 \pm 0.001$      |

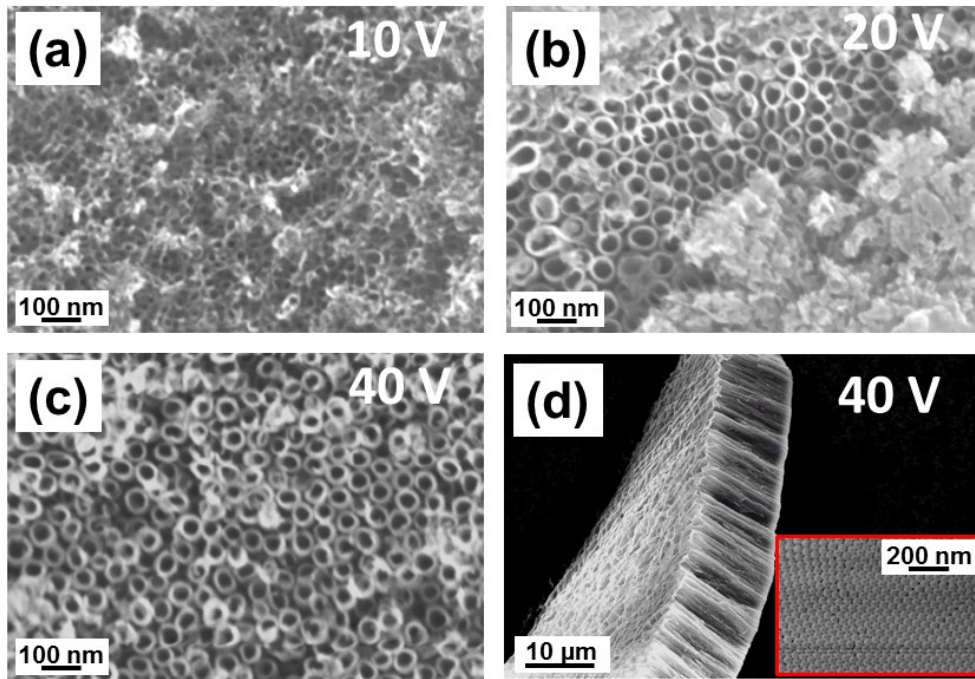

Fig. S1. SEM micrographs of the  $\text{TiO}_2/\text{SnO}_2$  nanotubes (T5S sample) at 10 V (a), 20 V (b) and 40 V (c), respectively, for 5 h. Cross-sectional view for the sample formed at 40 V (d). The inset in (d) shows the nanotube bottoms.

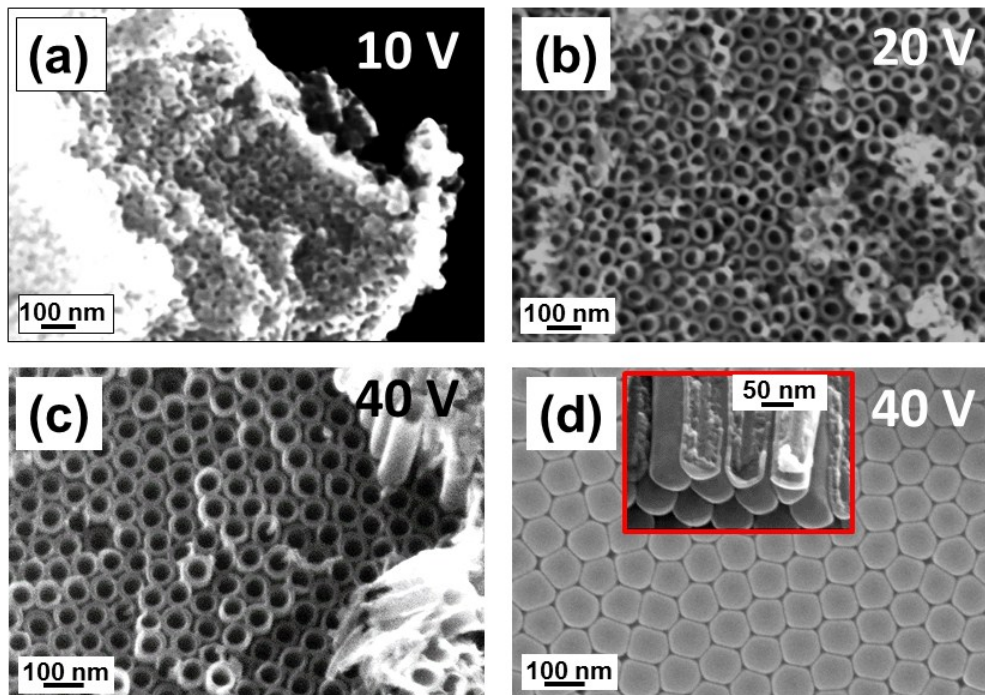

Fig. S2. SEM micrographs of the  $\text{TiO}_2/\text{SnO}_2$  nanotubes (T10S sample) formed at 10 V (a), 20 V (b) and 40 V (c), respectively, for 5 h. Bottom view of the sample formed at 40 V (d). The inset in (d) shows the cross-sectional nanotube walls.

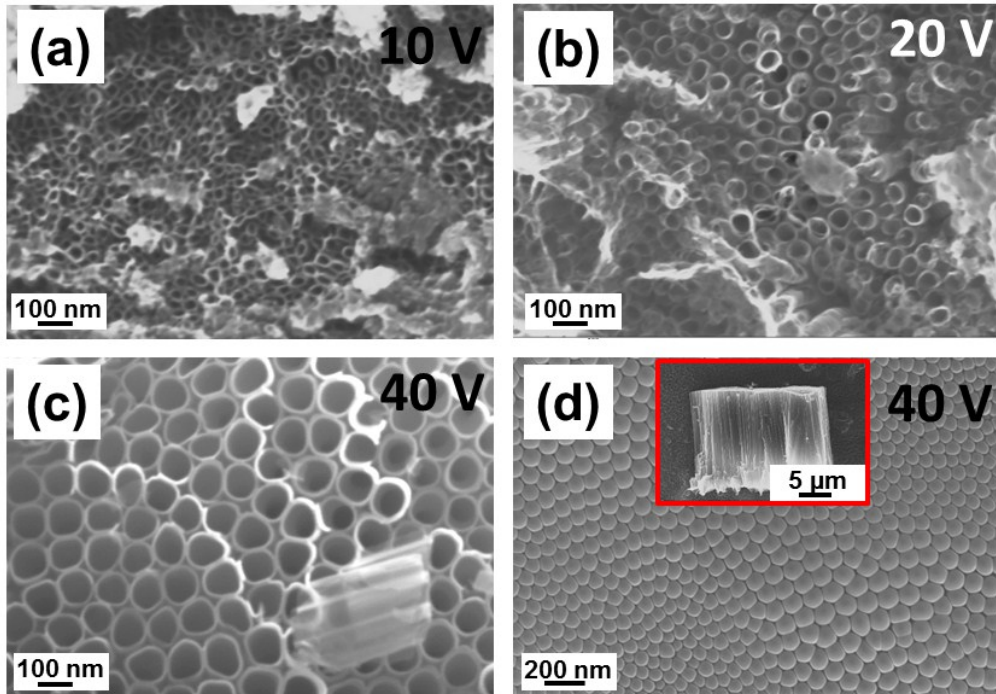

Fig. S3. SEM micrographs of pure  $\text{TiO}_2$  nanotubes formed at 10 V (a), 20 V (b) and 40 V (c), respectively, for 5 h. Bottom view of the sample formed at 40 V (d). The inset in (d) shows the cross-sectional view.

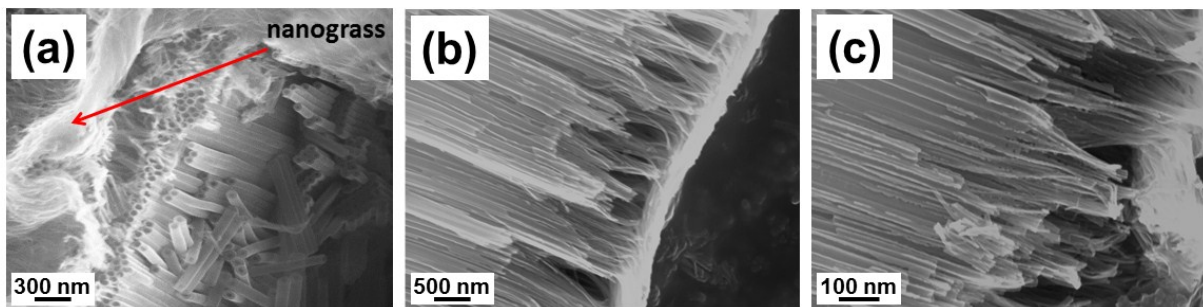

Fig. S4. SEM micrographs of  $\text{TiO}_2/\text{SnO}_2$  nanotubes (T10S sample) prepared at 40 V; Top view showing the nanograss formed on the top of the some nanotubes (a), cross-sectional view at low magnification (b), cross-sectional view at high magnification showing the separation of the nanotube walls into nanoneedles or nanograss.

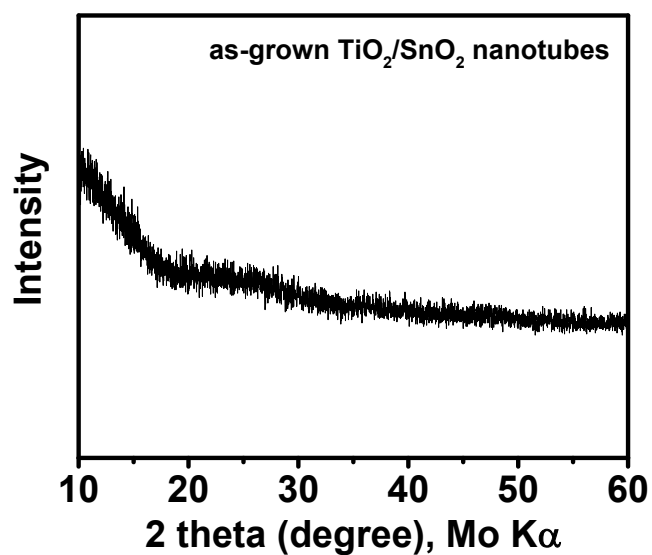

Fig. S5. XRD pattern of the as-grown  $\text{TiO}_2/\text{SnO}_2$  nanotubes (T10S sample) prepared at 40 V represents the amorphous state of the as-grown nanotubes.

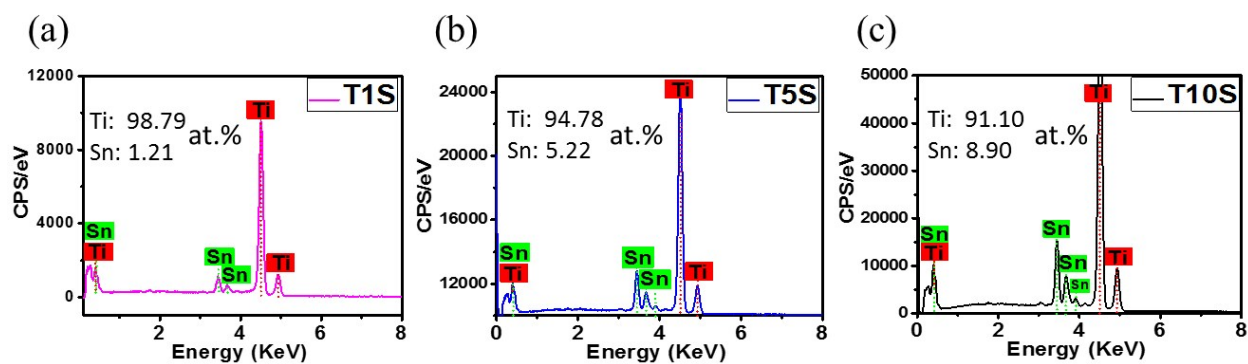

Fig. S6. Quantitative analysis of Ti and Sn contents in T1S (a), T5S (b) and T10S (c) electrodes obtained from EDXS elemental mapping.
